# Supplementary material
Source: PubMed Central journal article supplement (PMC1224686)
Supplement: 7600796s2.pdf [file 7600796s2.pdf]

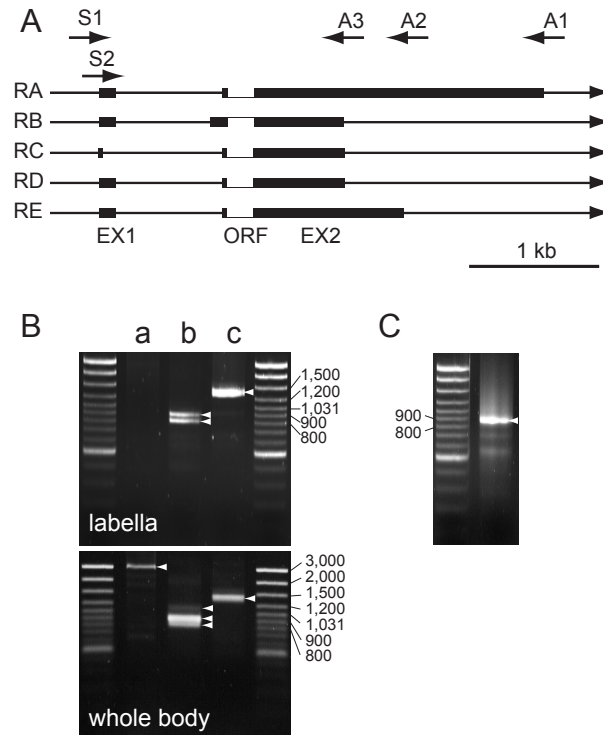

**Figure S2** Alternative transcriptional forms of *GγI* are expressed in gustatory organ. (A) A schematic diagram shows the gene structure of five transcripts of *GγI* gene. Arrows show primer sites used for detection of *GγI* transcripts (S1, S2 and A1-3). (B) Multiple transcript forms of *GγI* were detected by RT-PCR in taste organ. Primers combinations are: *GγI*.RA (a: S1 and A1), *GγI*.RB,C and D (b: S1 and A3) and *GγI*.RD (c: S1 and A2). Primer sequences are: S1, TATCGCCGCGCGGCACATCA; A1, CGCACCGAACCCGGTGCCAC; A2, TGTTGTTACGGGAATGAAAT and A3, ATGTATTTCCGTTTTCGACTG. The sizes of PCR products are 2,580 bp (RA), 1,114 bp (RB); 832 bp (RC), 923 bp (RD) and 1,405 bp (RE). Lane numbers (a, b and c) correspond to PCR reactions using different primer combination (a: S1-A1, b: S1-A3 and c: S1-A2). These results show expression of *GγI*.RC (832 bp) and RE (1,405 bp). However, the PCR product size of 923 bp is possibly derived from *GγI*.RD and there remains a possibility that this PCR product is derived from *GγI*.RA. To discern this possibility, we carried out 3' RACE and *GγI*.RD was detected from labellum mRNA. (C) 3' RACE shows expression of *GγI*.RD in labellum. Primers used for 3' RACE: forward, AAACATATAAGCCGGAGCTG and dT24. PCR product of *GγI*.RD is 825 bp. All PCR products were confirmed by sequencing. These results suggest that *GγI*.RC, RD and RE are expressed in labellum.
